# Supplementary material for: Sewing machine stitching of polyvinylidene fluoride fibers: programmable textile patterns for wearable triboelectric sensors
Source: Royal Society of Chemistry journal article supplement (doi:10.1039/c8ta08485h), 2018-01-01
Supplement: c8ta08485h5.pdf [file c8ta08485h5.pdf]

## Supporting Information

### **Sewing Machine Stitching of Polyvinylidene Fluoride Fibers: Programmable Textile Patterns for Wearable Triboelectric Sensors**

*Young-Eun Shin<sup>a</sup>, Jeong-Eun Lee<sup>b</sup>, Yoojeong Park<sup>a</sup>, Sang-Ha Hwang<sup>b</sup>, Han Gi Chae<sup>b\*</sup>, Hyunhyub Ko<sup>a\*</sup>*

<sup>a</sup>School of Energy and Chemical Engineering, Ulsan National Institute of Science and Technology (UNIST), 50 UNIST-gil, Ulsan 44919, Republic of Korea

<sup>b</sup>School of Materials Science and Technology, Ulsan National Institute of Science and Technology (UNIST), 50 UNIST-gil, Ulsan 44919, Republic of Korea

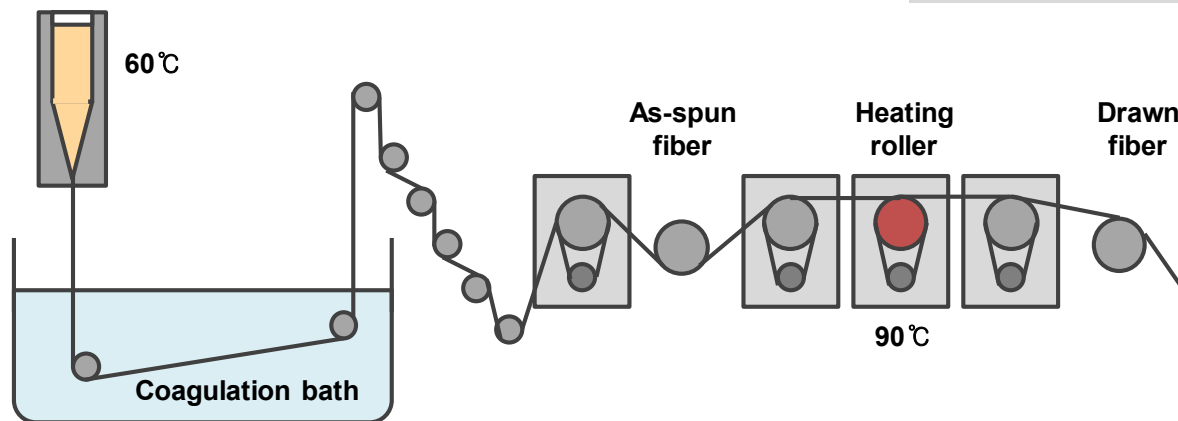

**Figure S1.** A schematic illustration of the lab scale dry-jet wet spinning procedure.

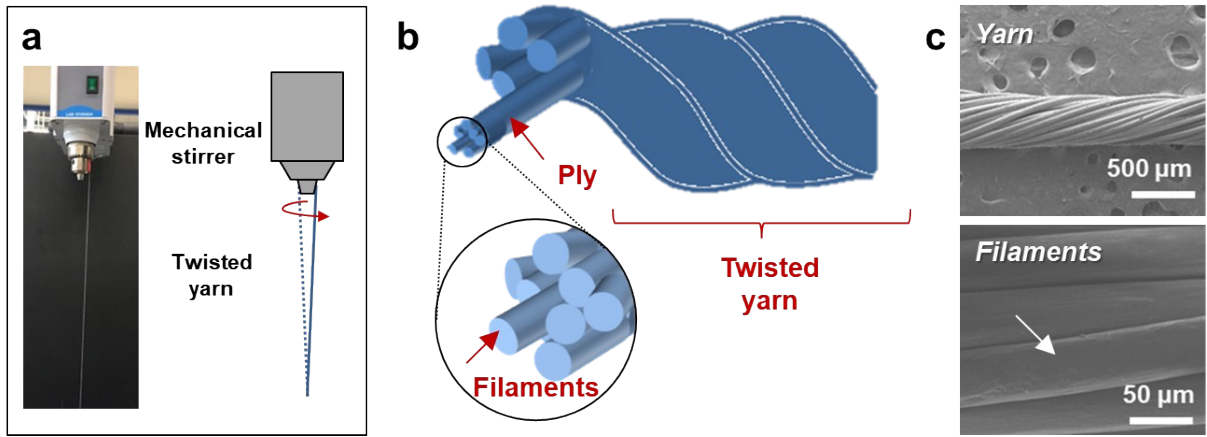

**Figure S2.** Twisting procedure for multi-ply PVDF yarn. (a) Photographic images of the twisting procedure. (b) A schematic illustration of the PVDF yarn composed of 40-filaments. (c) SEM images of PVDF yarn and filaments.

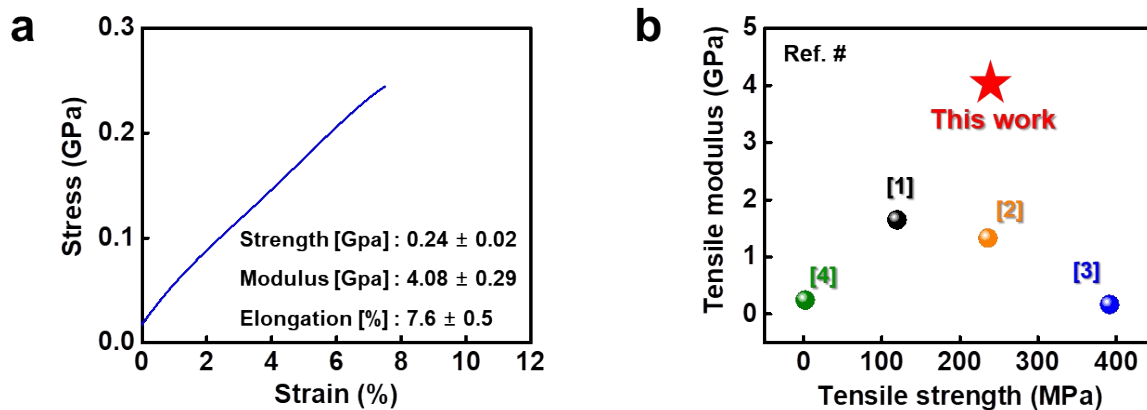

**Figure S3.** Mechanical characteristics of dry-jet wet-spun PVDF in this work; (a) Strain-stress curves, and (b) comparison of tensile modulus and strength based on this work and previous reports.

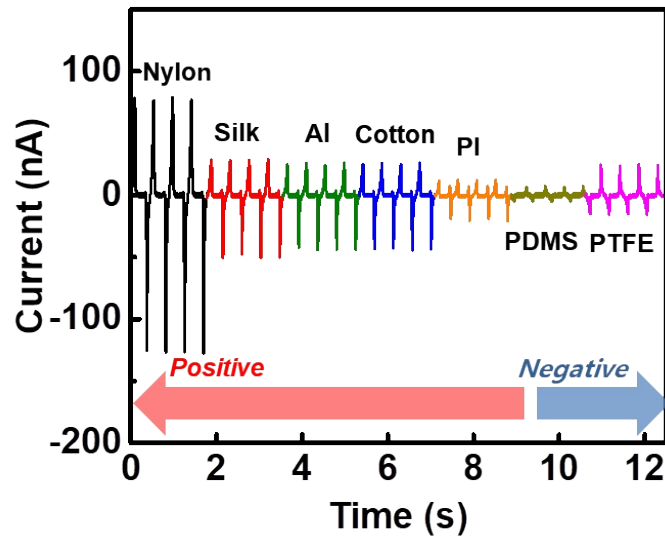

**Figure S4.** Triboelectric output current profiles of PVDF stitch textile sensor with relative contact-separation motion to different materials.

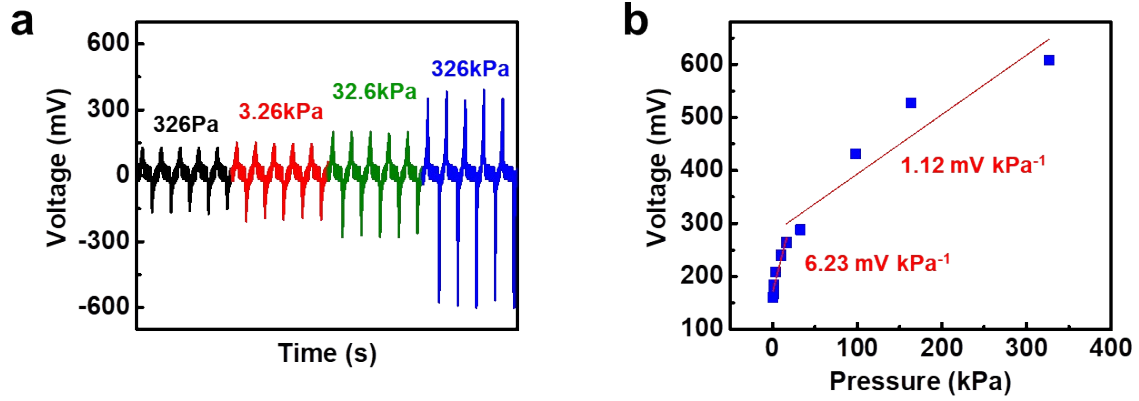

**Figure S5.** Evaluation of the PVDF stitch-based textile sensor for self-powered force sensing; (a) Triboelectric output voltage as a function of time at different pressures applied on the device. (b) Linear fitting between the triboelectric voltage variations and the applied pressure (326 Pa ~ 326 kPa).

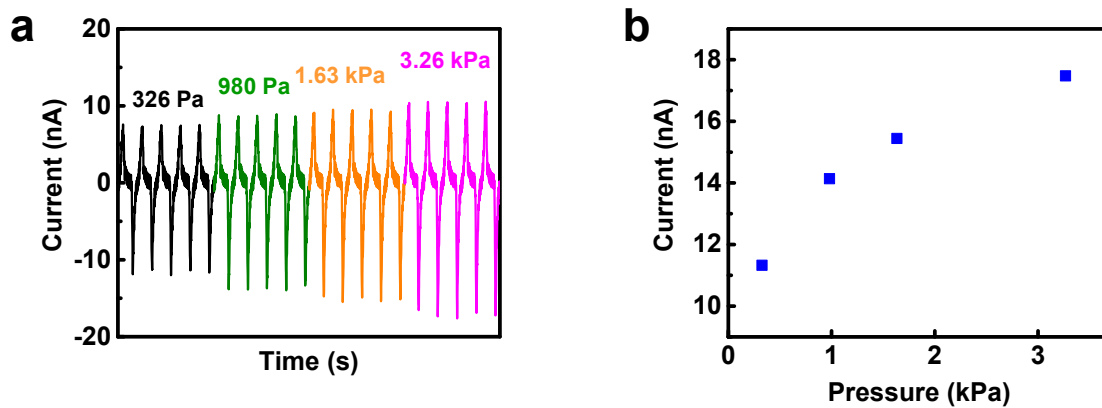

**Figure S6.** Triboelectric output signals in the low-pressure region (a) Triboelectric output current as a function of time and (b) the applied pressures from 326 Pa to 3.26 kPa in the low-pressure region.

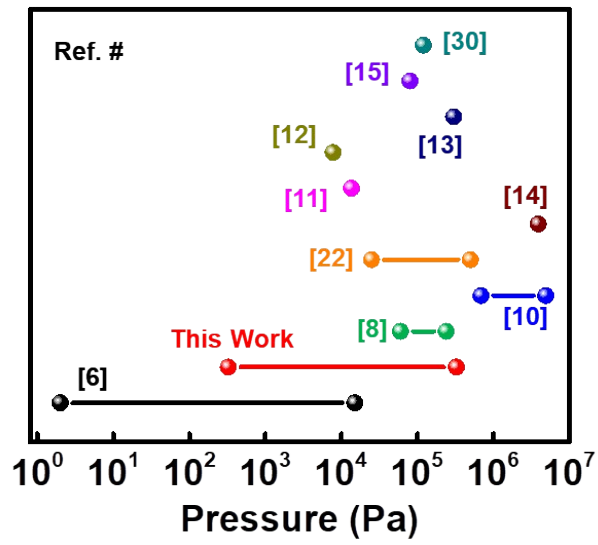

**Figure S7.** Comparison of the detectable pressure range of the results achieved in this work with previously reported triboelectric pressure sensor.



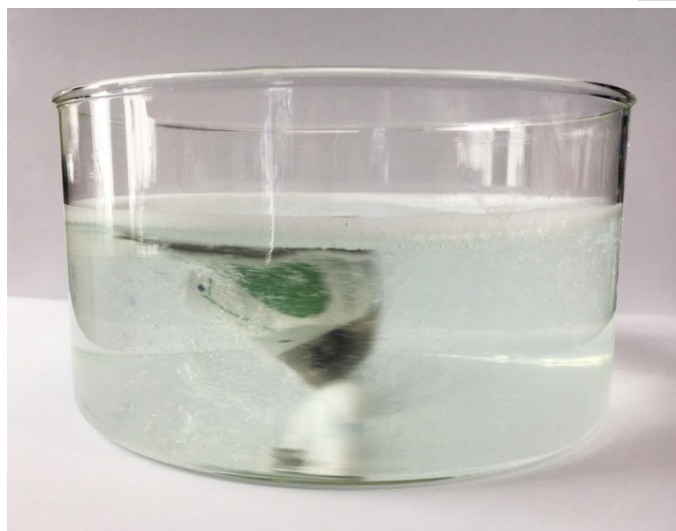

**Figure S8.** Washing durability of PVDF stitch textile sensor; Demonstration of the washing environment with commercial detergent by magnetic stirring.

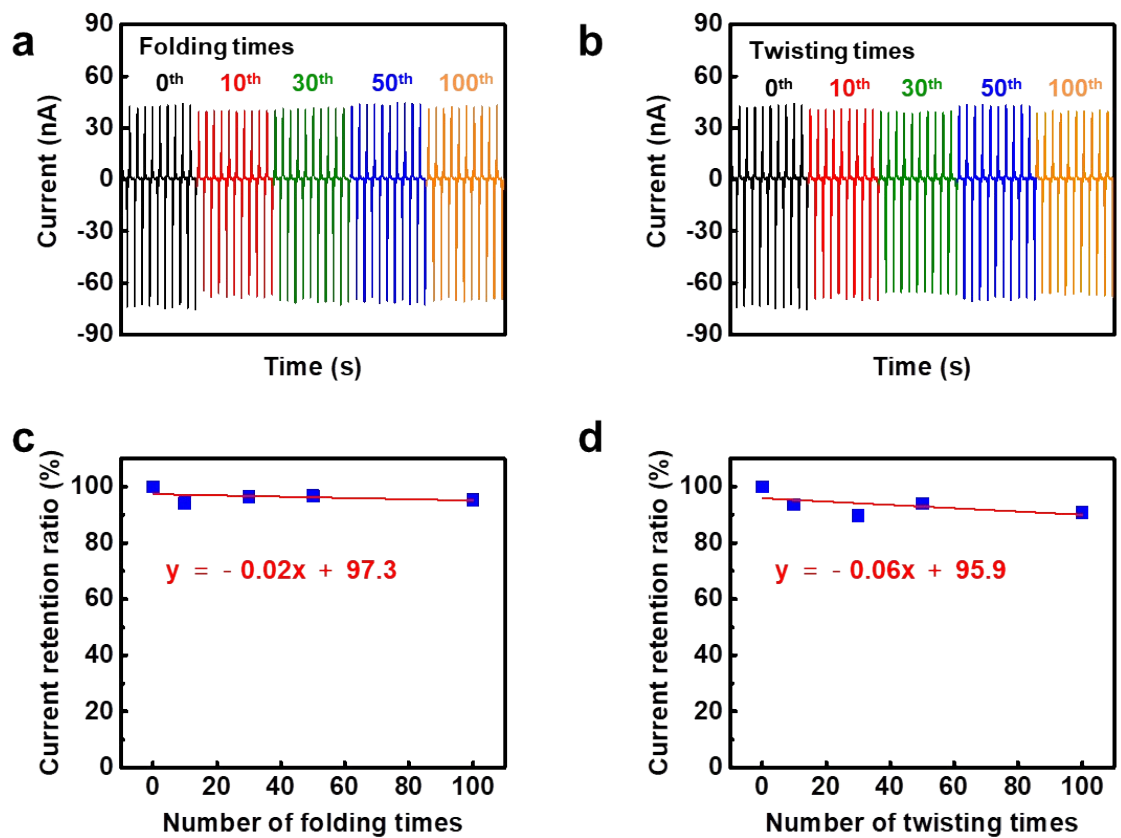

**Figure S9.** Evaluation of the PVDF stitch-based textile sensor for mechanical stability. (a, b) Triboelectric output current of the device after 100 cycles of mechanical deformation by folding and twisting. (c, d) Change of the triboelectric current retention ratio as a function of the number of mechanical deformation.

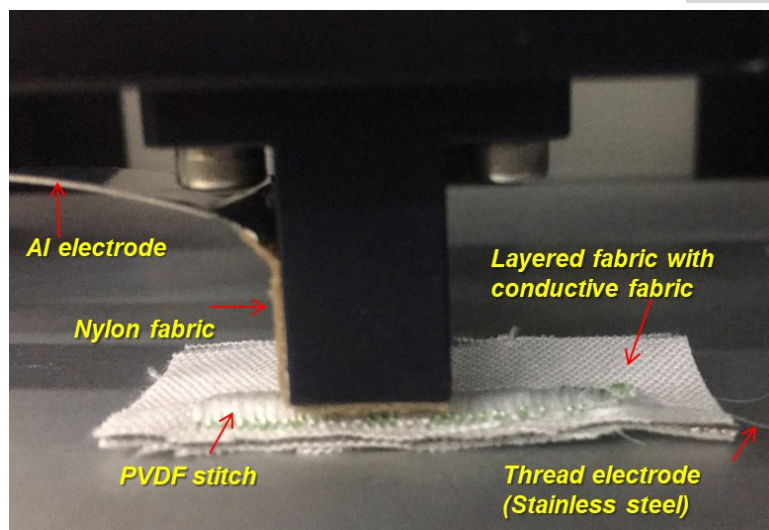

**Figure S10.** Experimental image of contact-separation motion between PVDF stitch and nylon fabric.

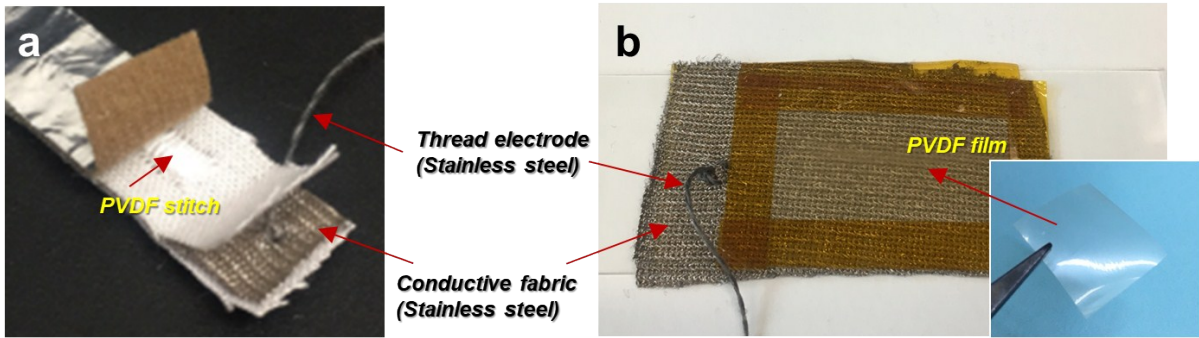

**Figure S11.** Comparison of both types of PVDF sensor. (a, b) Photographic images of (a) the stitch-based sensor and (b) the film-based sensor.

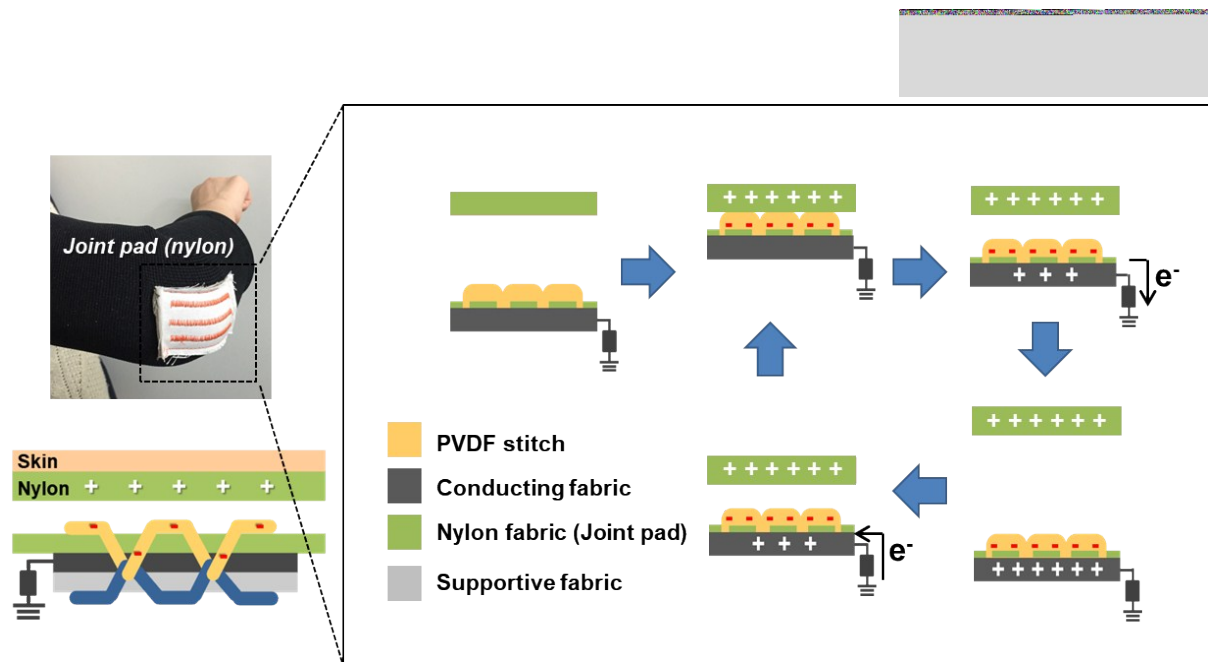

**Figure S12.** Working mechanism of PVDF stitch-based textile sensor as a body-motion sensor; Schematic illustration of triboelectric charge generation and electrons flow mechanism with single electrode system.

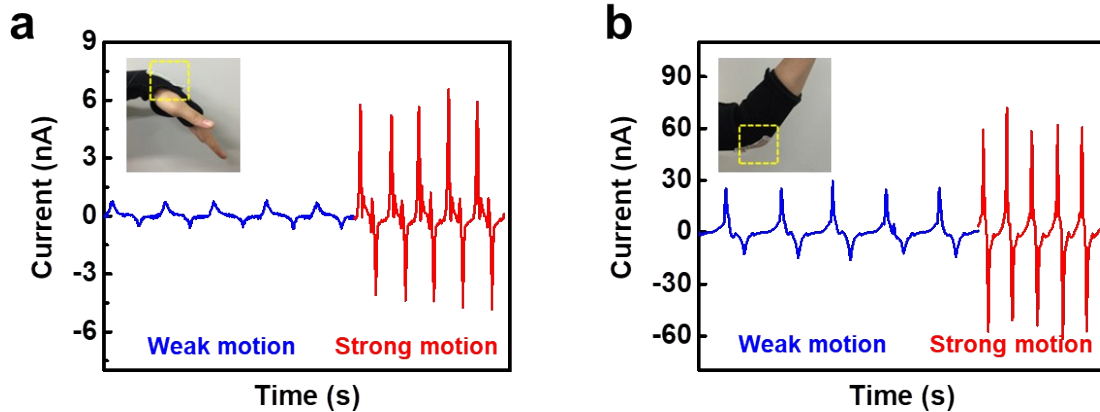

**Figure S13.** Real-time detection of body motion with different strength; (a) Output current signals from wrist movements with weak and strong motion. (b) Output current signals from elbow movements with weak and strong motion.

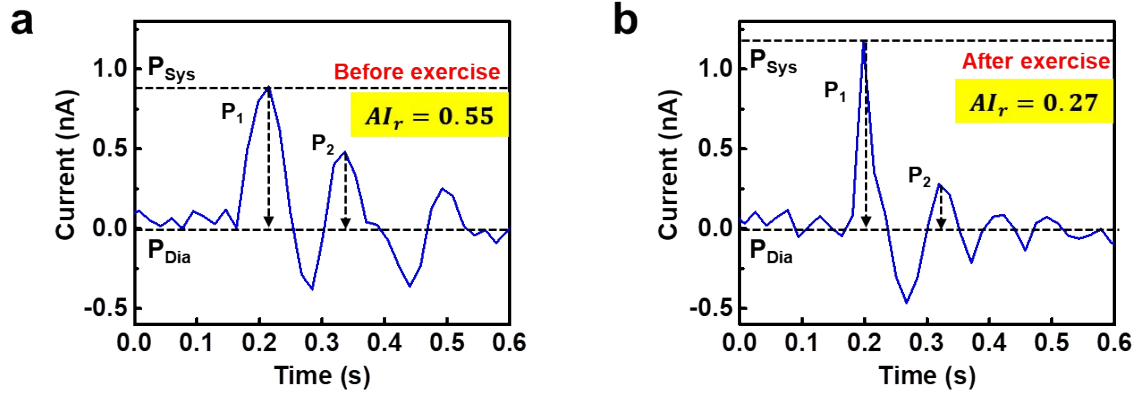

**Figure S14.** Comparison of augmentation index ( $AI_r$ ) before and after physical exercise.

**Table S1.** Comparison of mechanical characteristics of the results achieved in this work with previously reported as-spun PVDF fibers.

| <b>Fiber</b>                                 | <b>Strength (GPa)</b> | <b>Young's modulus (GPa)</b> |
|----------------------------------------------|-----------------------|------------------------------|
| Melt-spun PVDF <sup>[1]</sup>                | 0.12                  | 1.65                         |
| Melt-spun PVDF <sup>[2]</sup>                | 0.24                  | 1.33                         |
| Electro-spun PVDF <sup>[3]</sup>             | 0.39                  | 1.69                         |
| Electro-spun PVDF <sup>[4]</sup>             | 0.002                 | 0.25                         |
| <b>Dry-jet wet-spun PVDF<br/>(this work)</b> | <b>0.24</b>           | <b>4</b>                     |



**Table S2.** Comparison of detection range of the results achieved in this work with previously reported textile-based sensors.

| Textile fabrication      | Basic materials                                       | Detection range         | Sensor type                               |
|--------------------------|-------------------------------------------------------|-------------------------|-------------------------------------------|
| Embedment                | Cotton fabric coated CNT & Ni                         | 2 Pa ~ 15 kPa           | Resistive <sup>[5]</sup>                  |
|                          | Electrically Cu, Ni plating fabric, PE fabric         | 0.69 MPa ~ 4.9 MPa      | Resistive <sup>[6]</sup>                  |
|                          | PET fabric with PDMS, CNT, Ag                         | 40 kPa ~ 240 kPa        | Triboelectric <sup>[7]</sup>              |
|                          | Conductive thread stripes, synthetic elastic foam     | ~13.6 kPa               | Capacitive <sup>[8]</sup>                 |
|                          | Conductive fabric, 3D textile                         | ~ 7.8 kPa               | Capacitive <sup>[9]</sup>                 |
| Hand weaving             | Ag-coated textile, Proprietary Closed Cell Resin      | ~ 300 kPa               | Capacitive <sup>[10]</sup>                |
|                          | Kevlar coaxial thread coated with SBS/AgNP            | ~ 3.9MPa                | Capacitive <sup>[11]</sup>                |
|                          | PVDF strap with electrode Hollow PDMS tube            | ~ 80kPa                 | Piezoelectric, Capacitive <sup>[12]</sup> |
|                          | Commercial stainless steel/PET fiber coated with PDMS | -                       | Triboelectric <sup>[13]</sup>             |
| Machine-weaving          | PET fabric coated with Ni & Parylene                  | -                       | Triboelectric <sup>[14]</sup>             |
|                          | PET thread coated with Cu & PI                        | -                       | Triboelectric <sup>[15]</sup>             |
| Machine-knitting         | Metallic stripes, semi conductive fabric              | 25 kPa ~ 500 kPa        | Resistive <sup>[16]</sup>                 |
|                          | Nylon fiber coated with graphene & nylon              | -                       | Triboelectric <sup>[17]</sup>             |
| Sewing machine stitching | Ag-coated conductive thread, 3D textile               | ~ 120 kPa               | Capacitive <sup>[18]</sup>                |
|                          | <b>As-spun PVDF on conductive fabric</b>              | <b>326 Pa ~ 326 kPa</b> | <b>Triboelectric (This work)</b>          |

**Table S3.** Comparison of detection range and sensitivity of the results achieved in this work with previously reported triboelectric pressure sensors.

| Type                                              | Basic materials                              | Detection range                              | Sensitivity                                                                                                                                           |
|---------------------------------------------------|----------------------------------------------|----------------------------------------------|-------------------------------------------------------------------------------------------------------------------------------------------------------|
| Film <sup>[19]</sup>                              | PDMS, Al                                     | 0.6 ~ 30 MPa                                 | 6 MPa <sup>-1</sup> (0.6 ~ 200kPa ),<br>0.037 MPa <sup>-1</sup> (350 kPa ~ 30 MPa)                                                                    |
| Film <sup>[20]</sup>                              | PDMS, Liquid                                 | 0.4 ~ 40 N                                   | 0.036 nA N <sup>-1</sup>                                                                                                                              |
| Film <sup>[21]</sup>                              | PDMS, Al                                     | 1 ~ 150 kPa                                  | 0.06 kPa <sup>-1</sup> (1~80 kPa)                                                                                                                     |
| Film <sup>[22]</sup>                              | PVDF-TrFE, PDMS                              | 0.05 ~ 600 kPa                               | 104 mV kPa <sup>-1</sup> (0.05~5 kPa),<br>55 mV kPa <sup>-1</sup> (5~60 kPa),<br>49 mV kPa <sup>-1</sup> (60~600 kPa)                                 |
| Film <sup>[23]</sup>                              | Cu/PDMS, PTFE                                | ~50N                                         | 0.019 $\mu$ A N <sup>-1</sup> (0 ~ 40 N)                                                                                                              |
| Film <sup>[24]</sup>                              | PDMS                                         | 40 ~ 140 N                                   | 28 mV N <sup>-1</sup>                                                                                                                                 |
| Textile <sup>[7]</sup><br>(embedment)             | PET fabric<br>with PDMS, CNT, Ag             | 40 kPa ~ 240 kPa                             | -                                                                                                                                                     |
| <b>Textile<br/>(sewing machine<br/>stitching)</b> | <b>As-spun PVDF on<br/>conductive fabric</b> | <b>326 Pa ~ 326 kPa<br/>(9.8 mN ~ 9.8 N)</b> | <b>0.66 nA kPa<sup>-1</sup>, 6.23mV kPa<sup>-1</sup> (0.326 ~ 16.33 kPa),<br/>0.1 nA kPa<sup>-1</sup>, 1.12 mV kPa<sup>-1</sup> (16.33 ~ 326 kPa)</b> |

**Table S4.** Comparison of fabrication conditions and washability of the results achieved in this work with previously reported textile-based sensors.

| Fabrication                                       | Key material                                      | Electrode                  | Substrate                     | Delicate pattern | Washability | Sensor type                               |
|---------------------------------------------------|---------------------------------------------------|----------------------------|-------------------------------|------------------|-------------|-------------------------------------------|
| <b>Embedment in commercial thread or fabric</b>   |                                                   |                            |                               |                  |             |                                           |
| Coating                                           | Carbonized silk                                   | -                          | Silk fabric                   | -                | -           | Resistive <sup>[25]</sup>                 |
| CNT coating & Ni plating                          | CNT coated fabric & Ni                            | -                          | Cotton fabric                 | △                | -           | Resistive <sup>[5]</sup>                  |
| Stencil printing                                  | Ag-fluoroelastomer                                | -                          | Knitted fabric (Nylon/PU)     | △                | ○           | Resistive <sup>[26]</sup>                 |
| Coating                                           | PDMS, PET,                                        | Aligned CNT, Ag paste      | PET fabric                    | -                | -           | Triboelectric <sup>[7]</sup>              |
| Coating                                           | PDMS-AgNW, PTFE, PU-AgNW                          | AgNW                       | PU fiber                      | -                | -           | Triboelectric <sup>[27]</sup>             |
| Layering                                          | Cu, Ni- electroplating fabric, PE                 | Cu, Ni                     | PE fabric                     | -                | -           | Capacitive <sup>[6]</sup>                 |
| Layering                                          | Conductive thread stripes, synthetic elastic foam | Conductive thread          | Synthetic elastic foam        | -                | -           | Capacitive <sup>[8]</sup>                 |
| Layering                                          | Conductive fabric, 3D textile                     | Conductive fabric          | Conductive fabric, 3D textile | -                | -           | Capacitive <sup>[9]</sup>                 |
| Layering                                          | Ag-coated textile, Proprietary Closed Cell Resin  | Ag                         | -                             | -                | ○           | Capacitive <sup>[10]</sup>                |
| <b>Conventional textile fabrication technique</b> |                                                   |                            |                               |                  |             |                                           |
|                                                   | PDMS                                              | SBS/AgNP                   | Kevlar fiber                  | -                | -           | Capacitive <sup>[11]</sup>                |
|                                                   | PVDF, PET                                         | Metal                      | Elastic hollow tube           | -                | -           | Piezoelectric, Capacitive <sup>[12]</sup> |
|                                                   | CNT & PTFE                                        | CNT                        | Cotton thread                 | -                | -           | Triboelectric <sup>[28]</sup>             |
| Weaving (by hand)                                 | PDMS, Au-coated Al                                | Au-coated ZnO NWs/Al wire  | Al wire, Al foil              | -                | -           | Triboelectric <sup>[29]</sup>             |
|                                                   | PVDF-TrFE, Ag                                     | CNT, Ag-coated nylon yarn  | PU fiber                      | -                | -           | Triboelectric <sup>[30]</sup>             |
|                                                   | PDMS, stainless-steel/PET thread                  | Stainless-steel/PET thread | Stainless-steel/PET thread    | -                | ○           | Triboelectric <sup>[13]</sup>             |
|                                                   | Ni & parylene                                     | Ni                         | PET fabric                    | -                | -           | Triboelectric <sup>[14]</sup>             |
| Weaving (by Industrial weaving loom)              | Cu, PI                                            | Cu                         | PET thread                    | -                | ○           | Triboelectric <sup>[15]</sup>             |
|                                                   | Metallic stripes, semi-conductive fabric          | Metallic stripes           | Normal fabric                 | -                | -           | Resistive <sup>[16]</sup>                 |

| Fabrication                                            | Key material                            | Electrode                           | Substrate                            | Delicate pattern                             | Washability | Sensor type                      |
|--------------------------------------------------------|-----------------------------------------|-------------------------------------|--------------------------------------|----------------------------------------------|-------------|----------------------------------|
| <b>Conventional textile fabrication technique</b>      |                                         |                                     |                                      |                                              |             |                                  |
| Knitting (by hand)                                     | PDMS, stainless-steel/PET thread        | Stainless steel/PET thread          | Stainless steel/PET thread           | –                                            | ○           | Triboelectric <sup>[31]</sup>    |
| Knitting (by Harry Lucas circular knitting machine)    | CNT-wrapped spandex fiber               | -                                   | Spandex fiber                        | –                                            | –           | Resistive <sup>[32]</sup>        |
| Knitting (by Industrial knitting machine)              | PTFE thread, Ag thread                  | Ag thread                           | -                                    | Plain-, double-, rib patterns                | –           | Triboelectric <sup>[33]</sup>    |
| Knitting (by STOLL computerized flat knitting machine) | PTFE, Nylon                             | Graphene                            | Nylon fiber                          | –                                            | –           | Triboelectric <sup>[17]</sup>    |
| Sewing (by hand)                                       | Graphene nano platelets                 | -                                   | Commercial yarn                      | –                                            | –           | Resistive <sup>[34]</sup>        |
| <b>Stitching (by sewing machine)</b>                   | Ag/AgCl or carbon coated PET thread     | Ag/AgCl or carbon coated PET thread | PET thread                           | △                                            | –           | Electro-chemical <sup>[35]</sup> |
|                                                        | Melt-spun coaxial polymer optical fiber | -                                   | Polymer optical fiber                | △                                            | ○           | Photonic <sup>[36]</sup>         |
|                                                        | Ag-coated conductive thread, 3D textile | Ag-coated conductive thread         | Non-conductive textile               | –                                            | ○           | Capacitive <sup>[18]</sup>       |
|                                                        | <b>As-spun PVDF fiber</b>               | <b>Ag conductive fabric</b>         | <b>Various fabric (Cotton, Silk)</b> | <b>Various patterns, Letters, Embroidery</b> | ○           | <b>Triboelectric (This work)</b> |

**Movie S1.** Demonstration of the washing environment with commercial detergent by magnetic stirring.

**Movie S2.** Real-time detection of body motion (wrist).

**Movie S3.** Real-time detection of body motion (elbow).

**Movie S4.** Real-time detection of hand gestures.

## References

1. J. Yang, Q. Chen, F. Chen, Q. Zhang, K. Wang and Q. Fu, *Nanotechnology*, 2011, **22**, 355707.
2. A. Baji, Y.-W. Mai, M. Abtahi, S.-C. Wong, Y. Liu and Q. Li, *Compos. Sci. Technol.*, 2013, **88**, 1-8.
3. R. L. Hadimani, D. V. Bayramol, N. Sion, T. Shah, L. Qian, S. Shi and E. Siores, *Smart Mater. Struct.*, 2013, **22**, 075017.
4. J. Zheng, X. Yan, M.-M. Li, G.-F. Yu, H.-D. Zhang, W. Pisula, X.-X. He, J.-L. Duvail and Y.-Z. Long, *Nanoscale Res. Lett.*, 2015, **10**, 475.
5. M. Liu, X. Pu, C. Jiang, T. Liu, X. Huang, L. Chen, C. Du, J. Sun, W. Hu and Z. L. Wang, *Adv. Mater.*, 2017, **29**.
6. M. Inaba, Y. Hoshino, K. Nagasaka, T. Ninomiya, S. Kagami and H. Inoue, in *Intelligent Robots and Systems' 96, IROS 96, Proceedings of the 1996 IEEE/RSJ International Conference on*, Vol. 2, IEEE, 1996, 450-457.
7. L. Liu, J. Pan, P. Chen, J. Zhang, X. Yu, X. Ding, B. Wang, X. Sun and H. Peng, *J. Mater. Chem. A.*, 2016, **4**, 6077-6083.
8. M. Sergio, N. Manaresi, F. Campi, R. Canegallo, M. Tartagni and R. Guerrieri, *IEEE J. Solid-State Circuit*, 2003, **38**, 966-975.
9. T. Hoffmann, B. Eilebrecht and S. Leonhardt, *IEEE Sens. J.*, 2011, **11**, 1112-1119.
10. T. Holleczeck, A. Rüegg, H. Harms and G. Tröster, *Sensors, 2010 IEEE, IEEE: 2010*, 2010, **732-737**.
11. J. Lee, H. Kwon, J. Seo, S. Shin, J. H. Koo, C. Pang, S. Son, J. H. Kim, Y. H. Jang and D. E. Kim, *Adv. Mater.*, 2015, **27**, 2433.
12. Y. Ahn, S. Song and K.-S. Yun, *Smart Mater. Struct.*, 2015, **24**, 075002.
13. K. Dong, J. Deng, Y. Zi, Y. C. Wang, C. Xu, H. Zou, W. Ding, Y. Dai, B. Gu and B. Sun, *Adv. Mater.*, 2017, **29**.
14. X. Pu, L. Li, M. Liu, C. Jiang, C. Du, Z. Zhao, W. Hu and Z. L. Wang, *Adv. Mater.*, 2016, **28**, 98.
15. Z. Zhao, C. Yan, Z. Liu, X. Fu, L. M. Peng, Y. Hu and Z. Zheng, *Adv. Mater.*, 2016, **28**, 10267.
16. J. Cheng, M. Sundholm, B. Zhou, M. Hirsch and P. Lukowicz, *Pervasive and Mobile Computing*, 2016, **30**, 97.
17. M. Zhu, Y. Huang, W. S. Ng, J. Liu, Z. Wang, Z. Wang, H. Hu and C. Zhi, *Nano energy*, 2016, **27**, 439.

- 
18. J. Meyer, B. Arnrich, J. Schumm and G. Troster, *IEEE Sens. J.*, 2010, **10**, 1391.
  19. X. Wang, M. Que, M. Chen, X. Han, X. Li, C. Pan and Z. L. Wang, *Adv. Mater.*, 2017, **29**.
  20. Q. Shi, H. Wang, T. Wang and C. Lee, *Nano Energy*, 2016, **30**, 450.
  21. X. Wang, H. Zhang, L. Dong, X. Han, W. Du, J. Zhai, C. Pan and Z. L. Wang, *Adv. Mater.*, 2016, **28**, 2896.
  22. K. Parida, V. Bhavanasi, V. Kumar, R. Bendi and P. S. Lee, *Nano Res.*, 2017, **10**, 3557.
  23. K. Y. Lee, H. J. Yoon, T. Jiang, X. Wen, W. Seung, S. W. Kim and Z. L. Wang, *Adv. Ener. Mater.*, 2016, **6**.
  24. T. Li, J. Zou, F. Xing, M. Zhang, X. Cao, N. Wang and Z. L. Wang, *ACS nano* **2017**, **11**, 3950.
  25. C. Wang, X. Li, E. Gao, M. Jian, K. Xia, Q. Wang, Z. Xu, T. Ren and Y. Zhang, *Adv. Mater.*, 2016, **28**, 6640.
  26. H. Jin, N. Matsuhisa, S. Lee, M. Abbas, T. Yokota and T. Someya, *Adv. Mater.*, 2017, **29**.
  27. Y. Cheng, X. Lu, K. H. Chan, R. Wang, Z. Cao, J. Sun and G. W. Ho, *Nano Energy* 2017, **41**, 511.
  28. J. Zhong, Y. Zhang, Q. Zhong, Q. Hu, B. Hu, Z. L. Wang and J. Zhou, *ACS nano* 2014, **8**, 6273.
  29. K. N. Kim, J. Chun, J. W. Kim, K. Y. Lee, J.-U. Park, S.-W. Kim, Z. L. Wang and J. M. Baik, *ACS nano* 2015, **9**, 6394.
  30. H. J. Sim, C. Choi, S. H. Kim, K. M. Kim, C. J. Lee, Y. T. Kim, X. Lepró, R. H. Baughman and S. J. Kim, *Sci. Rep.*, 2016, **6**.
  31. K. Dong, Y.-C. Wang, J. Deng, Y. Dai, S. L. Zhang, H. Zou, B. Gu, B. Sun and Z. L. Wang, *ACS nano* 2017, **11**, 9490.
  32. J. Foroughi, G. M. Spinks, S. Aziz, A. Mirabedini, A. Jeiranikhameneh, G. G. Wallace, M. E. Kozlov and R. H. Baughman, *ACS nano* 2016, **10**, 9129.
  33. S. S. Kwak, H. Kim, W. Seung, J. Kim, R. Hinchet and S.-W. Kim, *ACS nano* 2017.
  34. J. J. Park, W. J. Hyun, S. C. Mun, Y. T. Park and O. O. Park, *ACS Appl. Mater. Interfaces*, 2015, **7**, 6317-6324.
  35. X. Liu and P. B. Lillehoj, *Lab Chip* 2016, **16**, 2093-2098.
  36. B. M. Quandt, F. Braun, D. Ferrario, R. M. Rossi, A. Scheel-Sailer, M. Wolf, G.-L. Bona, R. Hufenus, L. J. Scherer and L. F. Boesel, *J. R. Soc. Interface*, 2017, **14**, 20170060.
